# Supplementary material for: Unprecedent formation of methylsilylcarbonates from iridium-catalyzed reduction of CO2 with hydrosilanes
Source: Royal Society of Chemistry journal article supplement (doi:10.1039/d0ra00204f), 2020-01-01
Supplement: d0ra00204f1.pdf [file d0ra00204f1.pdf]

## Supporting Information

### Unprecedented Formation of Methylsilylcarbonates from Ir-Catalyzed Reduction of CO<sub>2</sub> with Hydrosilanes

Jefferson Guzmán, Pilar García-Orduña, Fernando J. Lahoz and Francisco J. Fernández-Alvarez\*

Departamento de Química Inorgánica – Instituto de Síntesis Química y Catálisis Homogénea (ISQCH).

Universidad de Zaragoza. Facultad de Ciencias 50009, Zaragoza – Spain.

e-mail: [paco@unizar.es](mailto:paco@unizar.es).

#### Table of Contents

|                                                                      |    |
|----------------------------------------------------------------------|----|
| 1. General information and experimental details .....                | 2  |
| 2. NMR Characterization of complex <b>3</b> .....                    | 3  |
| 3. NMR characterization of the methyl-silyl-carbonates species ..... | 6  |
| 4. Control Experiment .....                                          | 14 |
| 5. Crystal Structure Determination of Complex <b>3</b> .....         | 15 |

## 1. General information and experimental details

All manipulations were carried out under an argon atmosphere by Schlenk-type techniques or in a Glovebox MBraun Unilab. Organic solvents were dried by standard procedures and distilled under argon prior to use or obtained oxygen- and water-free from a solvent purification system (Innovative Technologies).  $^1\text{H}$ ,  $^{13}\text{C}$ ,  $^{29}\text{Si}$  and  $^{19}\text{F}$  NMR spectra were obtained on a Bruker AV-300, AV-400 or AV-500 spectrometer. Chemical shifts ( $\delta$ ), reported in ppm, are referenced to the residual solvent peaks and coupling constants ( $J$ ) are reported in Hz.

**Synthesis of  $[\text{Ir}(\text{NSiMe})_2(\text{CF}_3\text{SO}_3)]_2$  (**3**).** Toluene (10 mL) was added to a light-protected Schlenk containing  $[\text{Ir}(\text{NSi}^{\text{Me}})_2(\text{Cl})_2]$  (300 mg, 0.268 mmol) and silver triflate (151 mg, 0.590 mmol). The mixture was stirred at room temperature for 5 hours and then filtered through Celite. Solvent was removed under reduced pressure and the solid was washed with pentane (3 x 8 mL) to afford a white solid. Yield: 320 mg (89%).  $^1\text{H}$  NMR (300 MHz,  $\text{C}_6\text{D}_6$ , 298K):  $\delta$  8.73 (d,  $J_{\text{H-H}} = 6.2$  Hz, 2H, py), 6.32 (s, 2H, py), 6.02 (d,  $J_{\text{H-H}} = 6.3$  Hz, 2H, py), 1.51 (s, 6H, Me-py), 0.72 (s, 6H, Si-Me), 0.41 (s, 6H, Si-Me).  $^{13}\text{C}$  NMR (75 MHz,  $\text{C}_6\text{D}_6$ , 298K):  $\delta$  168.7 (s, py), 152.6 (s, py), 148.7 (s, py), 118.4 (s, py), 111.9 (s, py), 20.6 (s,  $\text{CH}_3$ -py), 3.8 (s,  $\text{CH}_3$ -Si), 2.4 (s,  $\text{CH}_3$ -Si).  $^{29}\text{Si}\{^1\text{H}\}$  NMR plus  $^1\text{H}$ - $^{29}\text{Si}$  HMBC (60 MHz,  $\text{C}_6\text{D}_6$ , 298 K):  $\delta$  38.2 (Si-Ir).  $^{19}\text{F}$  NMR (282 MHz,  $\text{C}_6\text{D}_6$ , 298K):  $\delta$  -76.97 ( $\text{CF}_3\text{SO}_3$ ). High resolution mass spectrometry (ESI<sup>+</sup>): calc.  $m/z = 525.1006$ ; found  $m/z = 525.1004$  ( $\text{M}^+ - \text{CF}_3\text{SO}_3$ ).

**Catalytic Reactions with 1 mol% of **3**.** A Young cap NMR tube was charged with 1 mol% of **3** (2.83 mg, 0.0042 mmol), 0.42 mmol of the corresponding silane (114  $\mu\text{L}$ ,  $\text{HSiMe}(\text{OSiMe}_3)_2$ ; 64.4  $\mu\text{L}$ ,  $\text{HSiMe}_2\text{Ph}$ ; 83.7  $\mu\text{L}$ ,  $\text{HSiMePh}_2$ ) and 0.5 mL of  $\text{C}_6\text{D}_6$ . Argon gas was evacuated by three freeze-pump-thaw cycles. Then the tube was pressurized with  $\text{CO}_2$  (3 bar) or  $^{13}\text{CO}_2$  (2.7 bar) and heated at 323 K.

**Selected data for  $^{13}\text{CH}_3\text{O}^{13}\text{CO}_2\text{SiMe}(\text{OSiMe}_3)_2$ .**  $^1\text{H}$  NMR plus HSQC  $^1\text{H}$ - $^{13}\text{C}$  (300 MHz,  $\text{C}_6\text{D}_6$ , 298 K):  $\delta$  3.33 (dd,  $J_{\text{H-C}} = 146.9$ , 4.1 Hz, 3H,  $\text{CH}_3\text{OCO}_2$ ).  $^{13}\text{C}\{^1\text{H}\}$  plus HSQC and HMBC  $^1\text{H}$ - $^{13}\text{C}$  (75 MHz,  $\text{C}_6\text{D}_6$ , 298 K):  $\delta$  153.0 (d,  $^2J_{\text{C-C}} = 1.7$  Hz,  $\text{CO}_3$ ), 54.1 (d,  $^2J_{\text{C-C}} = 1.7$  Hz,  $\text{CH}_3\text{O}$ ).  $^{29}\text{Si}\{^1\text{H}\}$  DEPT-45 NMR plus  $^1\text{H}$ - $^{29}\text{Si}$  HMBC (60 MHz,  $\text{C}_6\text{D}_6$ , 298 K): -55.8 (br,  $\text{CH}_3\text{OCO}_2\text{SiMe}(\text{OSiMe}_3)_2$ ).

**Selected data for  $^{13}\text{CH}_3\text{O}^{13}\text{CO}_2\text{SiMe}_2\text{Ph}$ .**  $^1\text{H}$  NMR plus HSQC  $^1\text{H}$ - $^{13}\text{C}$  (300 MHz,  $\text{C}_6\text{D}_6$ , 298 K):  $\delta$  3.30 (dd,  $^1J_{\text{H-C}} = 147.1$  Hz,  $^3J_{\text{H-C}} = 4.1$  Hz, 3H,  $\text{CH}_3\text{OCO}_2$ ).  $^{13}\text{C}\{^1\text{H}\}$  plus HSQC and HMBC  $^1\text{H}$ - $^{13}\text{C}$  (75 MHz,  $\text{C}_6\text{D}_6$ , 298 K):  $\delta$  154.1 (d,  $^2J_{\text{C-C}} = 1.7$  Hz,  $\text{CO}_3$ ), 54.2 (d,  $^2J_{\text{C-C}} = 1.7$  Hz,  $\text{CH}_3\text{O}$ ).  $^{29}\text{Si}\{^1\text{H}\}$  DEPT-45 NMR plus  $^1\text{H}$ - $^{29}\text{Si}$  HMBC (60 MHz,  $\text{C}_6\text{D}_6$ , 298 K): 14.3 (d,  $^2J_{\text{Si-C}} = 0.9$  Hz,  $\text{CH}_3\text{OCO}_2\text{SiMe}_2\text{Ph}$ ).

**Selected data for  $^{13}\text{CH}_3\text{O}^{13}\text{CO}_2\text{SiMePh}_2$ .**  $^1\text{H}$  NMR plus HSQC  $^1\text{H}$ - $^{13}\text{C}$  (300 MHz,  $\text{C}_6\text{D}_6$ , 298 K):  $\delta$  3.23 (dd,  $^1J_{\text{H-C}} = 147.1$  Hz,  $^3J_{\text{H-C}} = 4.1$  Hz, 3H,  $\text{CH}_3\text{OCO}_2$ ).  $^{13}\text{C}\{^1\text{H}\}$  plus HSQC and HMBC  $^1\text{H}$ - $^{13}\text{C}$  (75 MHz,  $\text{C}_6\text{D}_6$ , 298 K):  $\delta$  153.9 (d,  $^2J_{\text{C-C}} = 1.7$  Hz,  $\text{CO}_3$ ), 54.3 (d,  $^2J_{\text{C-C}} = 1.7$  Hz,  $\text{CH}_3\text{O}$ ).  $^{29}\text{Si}\{^1\text{H}\}$  DEPT-45 NMR plus  $^1\text{H}$ - $^{29}\text{Si}$  HMBC (60 MHz,  $\text{C}_6\text{D}_6$ , 298 K): 2.07 (d,  $^2J_{\text{Si-C}} = 1.1$  Hz,  $\text{CH}_3\text{OCO}_2\text{SiMePh}_2$ ).

## 2. NMR Characterization of complex 3

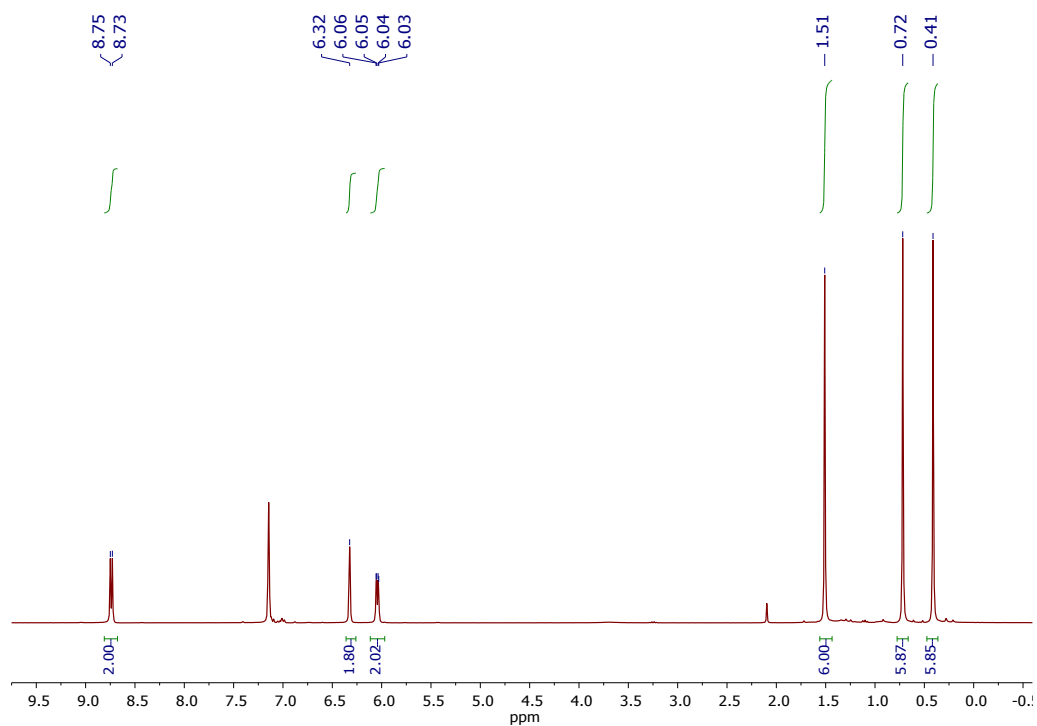

Figure S1. <sup>1</sup>H-NMR spectrum of complex 3

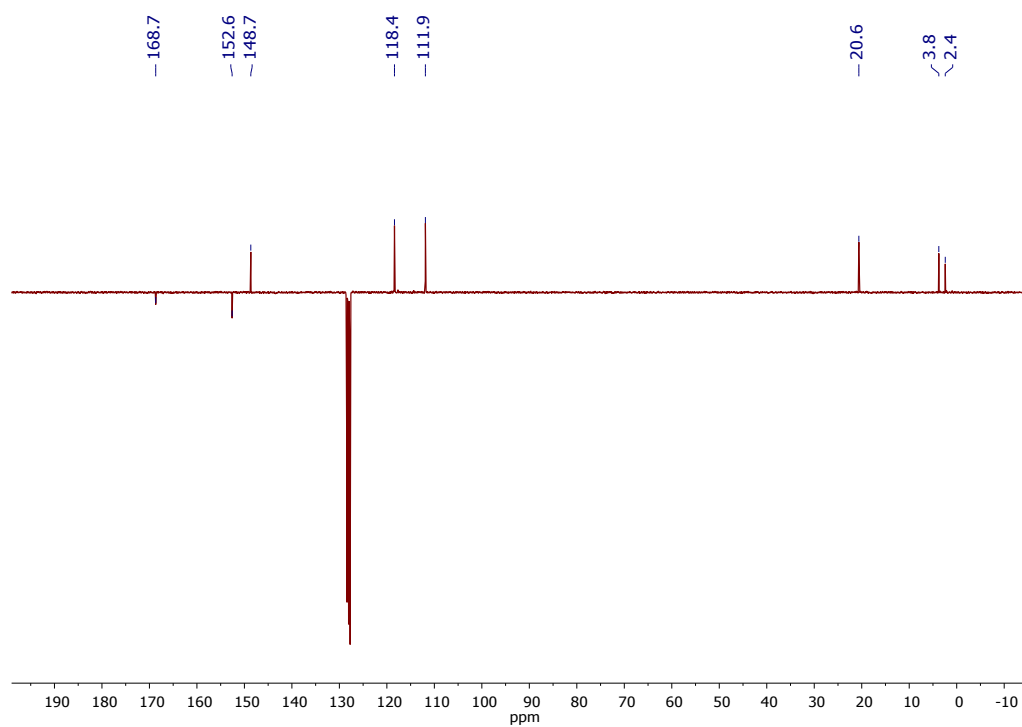

Figure S2. <sup>13</sup>C APT NMR spectrum of complex 3

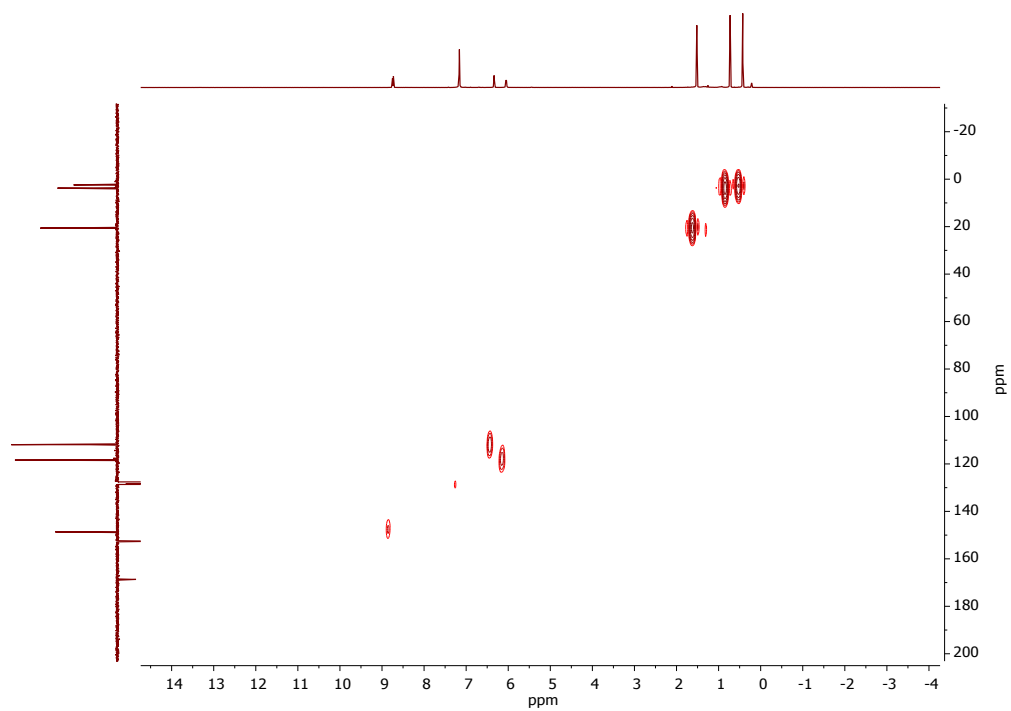

**Figure S3.**  $^1\text{H}$ - $^{13}\text{C}$  HSQC spectrum of complex **3**

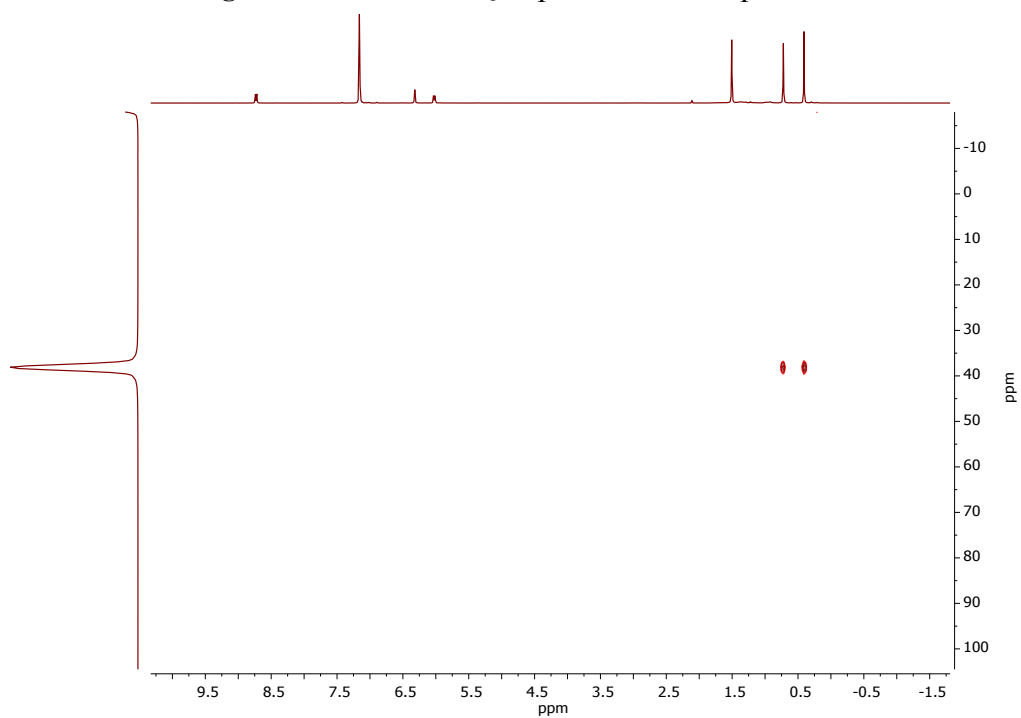

**Figure S4.**  $^1\text{H}$ - $^{29}\text{Si}$  HMBC spectrum of complex **3**

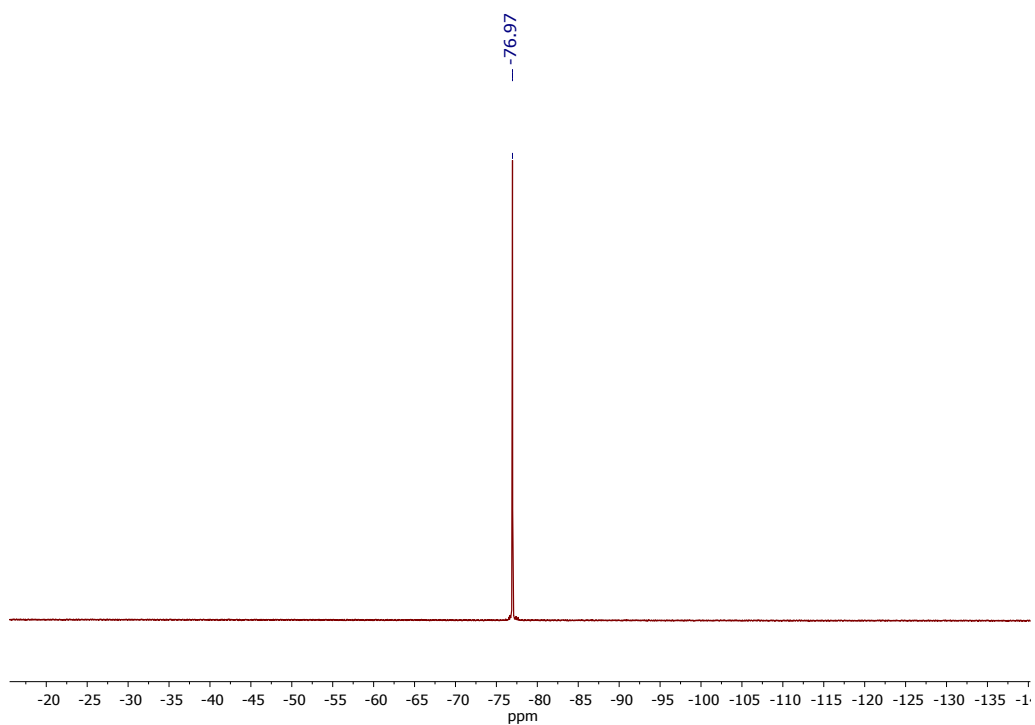

**Figure S5.**  $^{19}\text{F}$  NMR spectrum of complex **3**

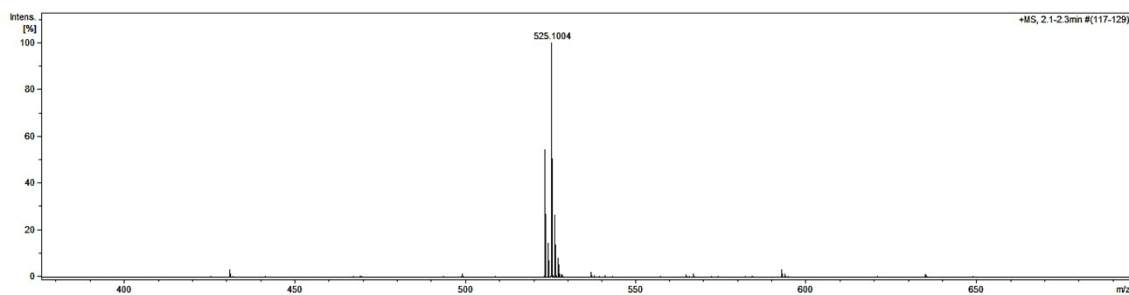

**Figure S6.** HR-MS spectrum of complex **3**

### 3. NMR characterization of the methyl-silyl-carbonates species

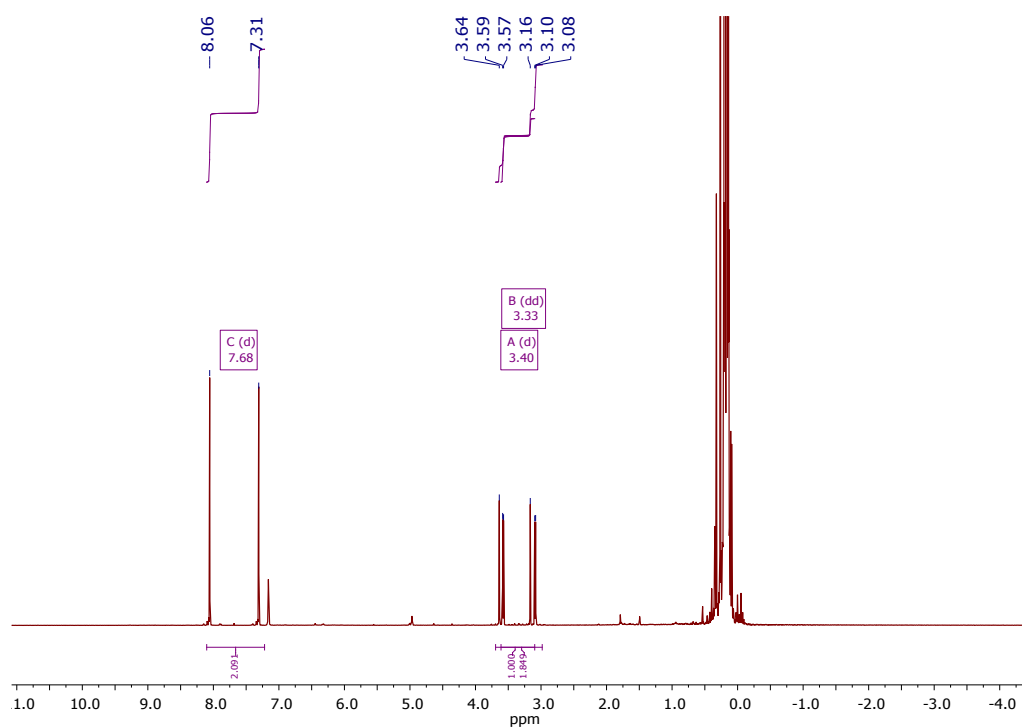

Figure S7.  $^1\text{H}$  NMR from the **3**-catalyzed reaction of  $^{13}\text{CO}_2$  with HMTS after 12 hours

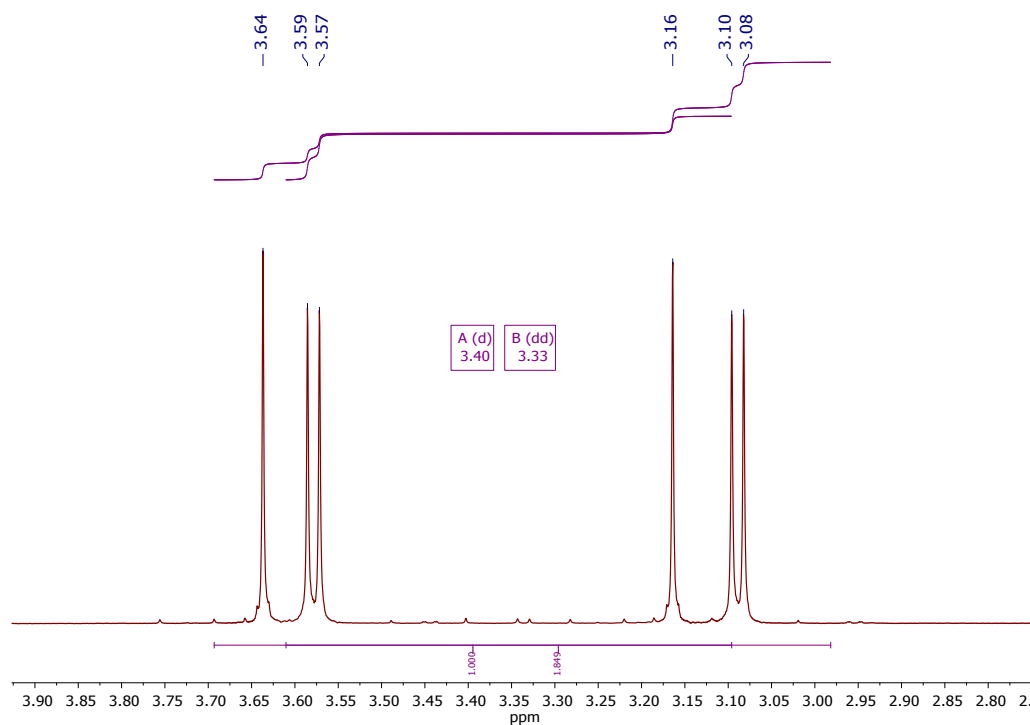

Figure S8.  $^1\text{H}$  NMR detail showing the  $^{13}\text{CH}_3\text{O}$ - products. [A =  $^{13}\text{CH}_3\text{OSiMe}(\text{OSiMe}_3)_2$ ; B =  $^{13}\text{CH}_3\text{O}^{13}\text{CO}_2\text{SiMe}(\text{OSiMe}_3)_2$ ]

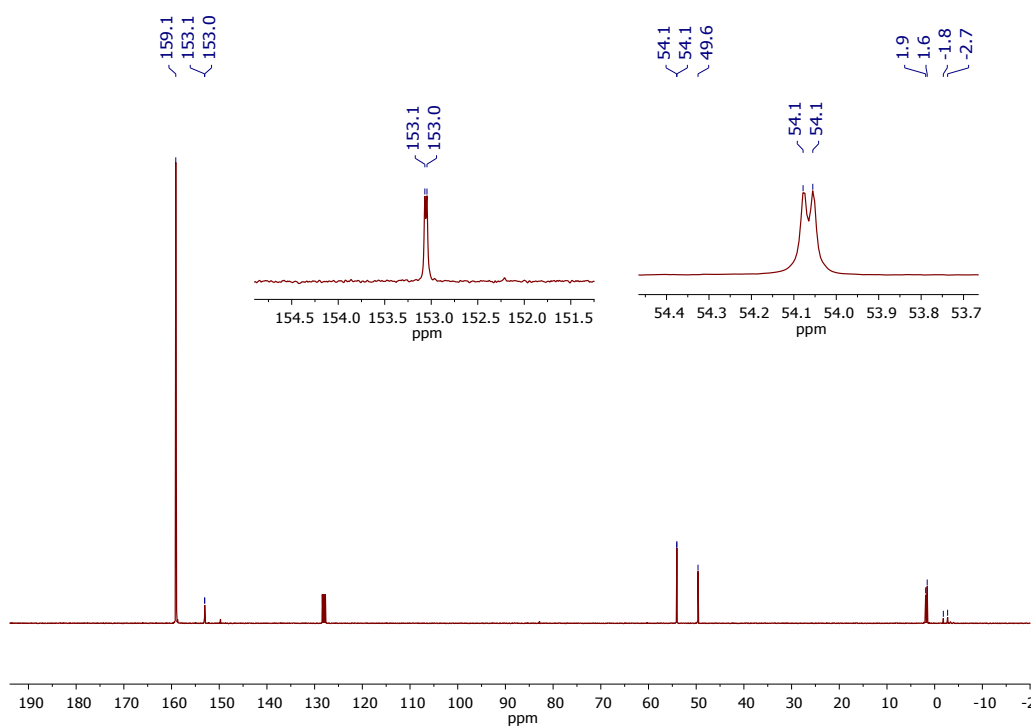

**Figure S9.**  $^{13}\text{C}\{^1\text{H}\}$  NMR from the **3**-catalyzed reaction of  $^{13}\text{CO}_2$  with HMTS after 12 hours (with details showing the  $^{13}\text{C}$ - $^{13}\text{C}$  coupling in the  $^{13}\text{CH}_3\text{O}^{13}\text{CO}_2\text{SiMe}(\text{OSiMe}_3)_2$  compound)

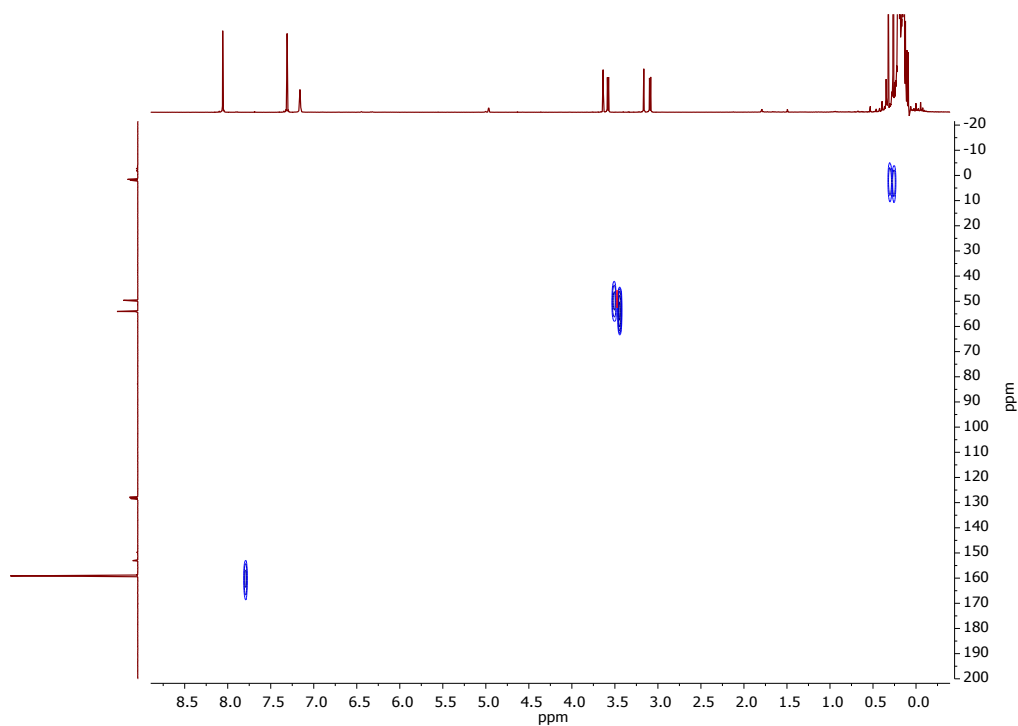

**Figure S10.**  $^1\text{H}$ - $^{13}\text{C}$  HSQC spectrum from the **3**-catalyzed reaction of  $^{13}\text{CO}_2$  with HMTS

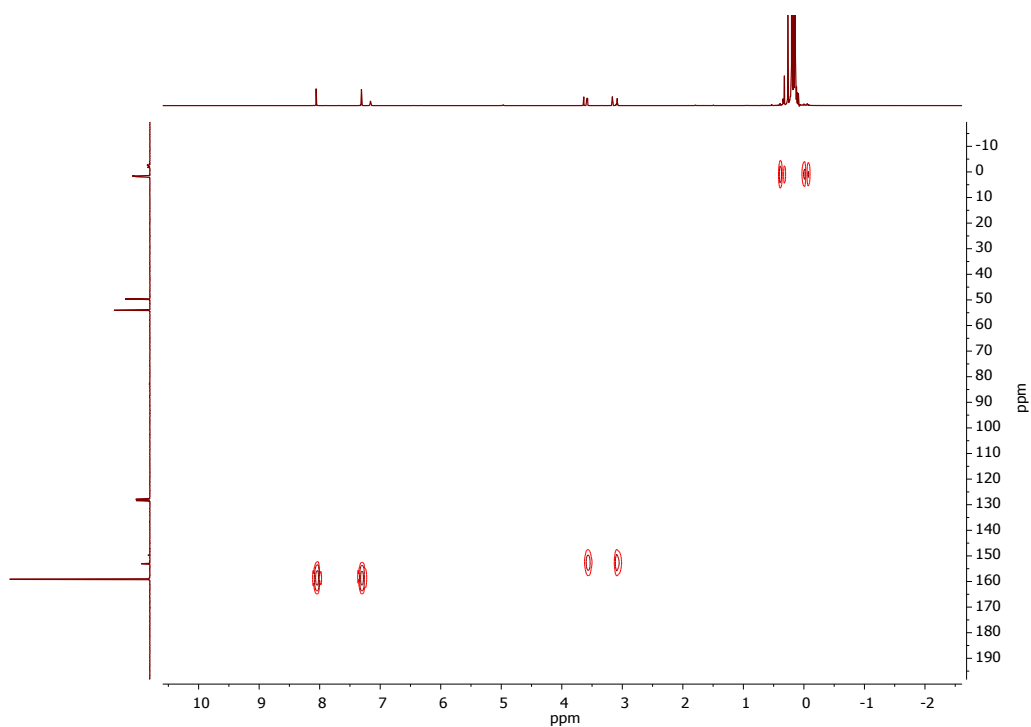

**Figure S11.**  $^1\text{H}$ - $^{13}\text{C}$  HMBC spectrum from the **3**-catalyzed reaction of  $^{13}\text{CO}_2$  with HMTS

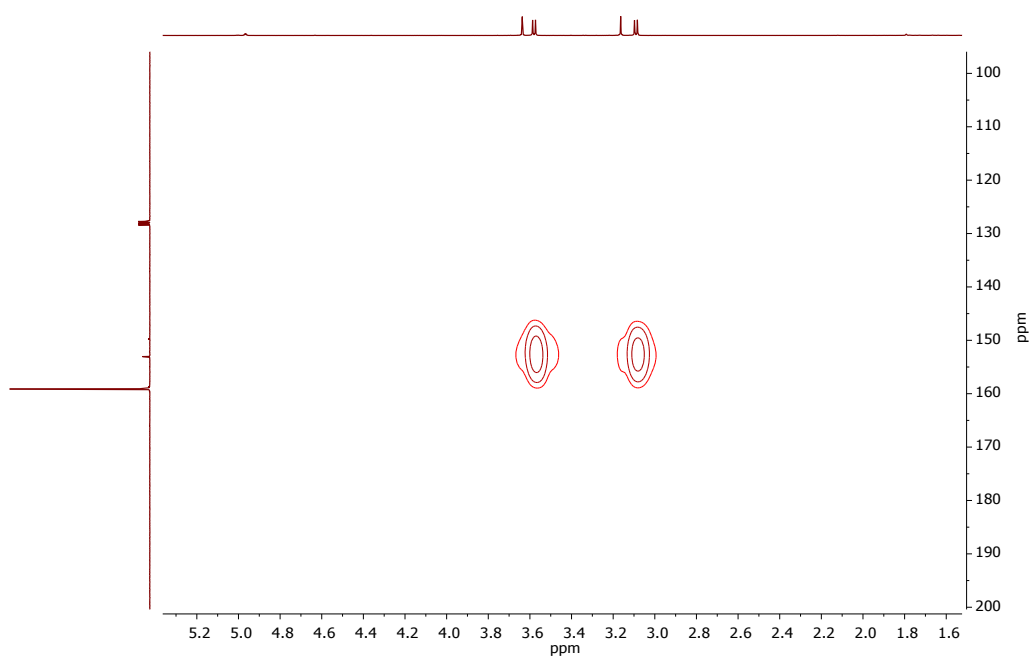

**Figure S12.** Detail from  $^1\text{H}$ - $^{13}\text{C}$  HMBC spectrum showing multiple bond correlation of the  $\text{CH}_3\text{O}$  protons with the carbonate



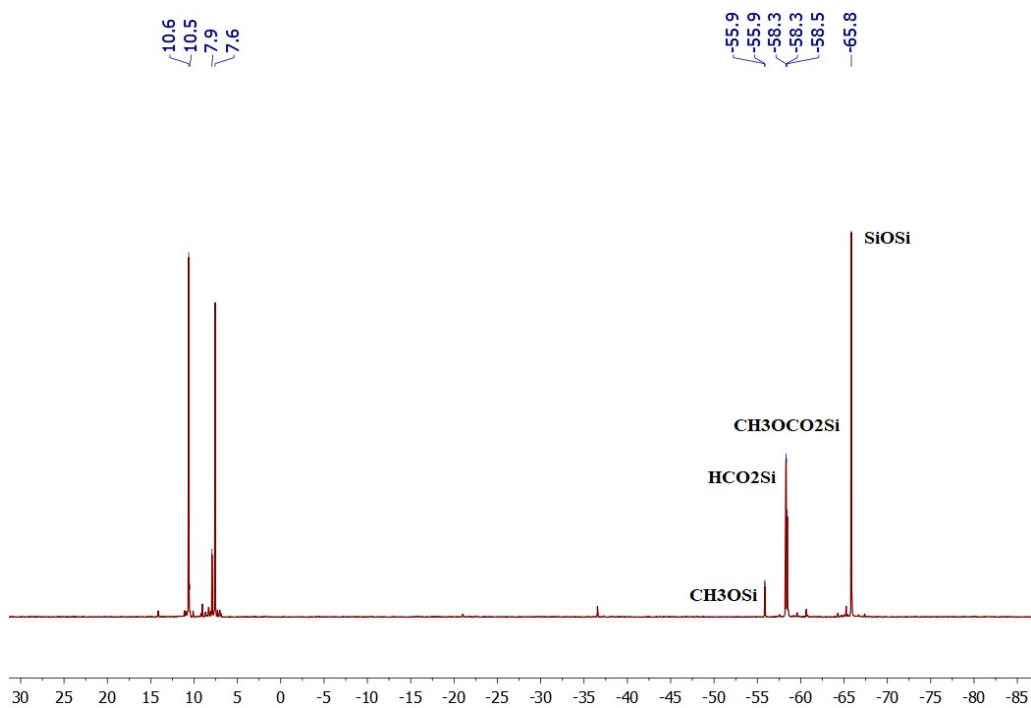

**Figure S13.** <sup>29</sup>Si DEPT from the **3**-catalyzed reaction of <sup>13</sup>CO<sub>2</sub> with HMTS

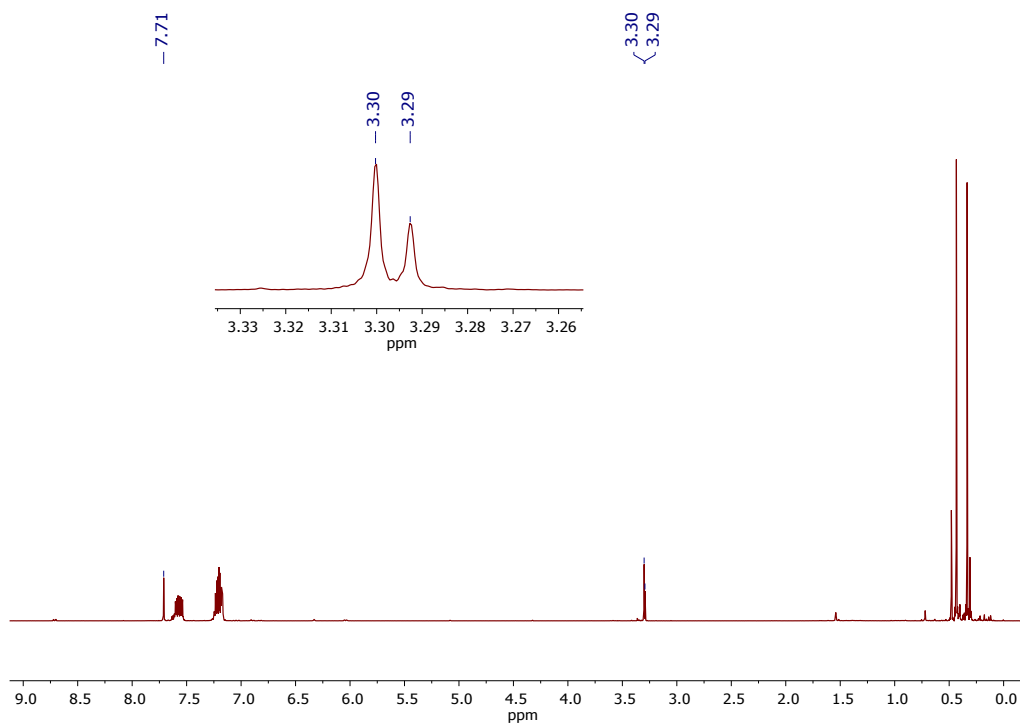

**Figure S14.** <sup>1</sup>H NMR from the **3**-catalyzed reaction of <sup>12</sup>CO<sub>2</sub> with HSiMe<sub>2</sub>Ph

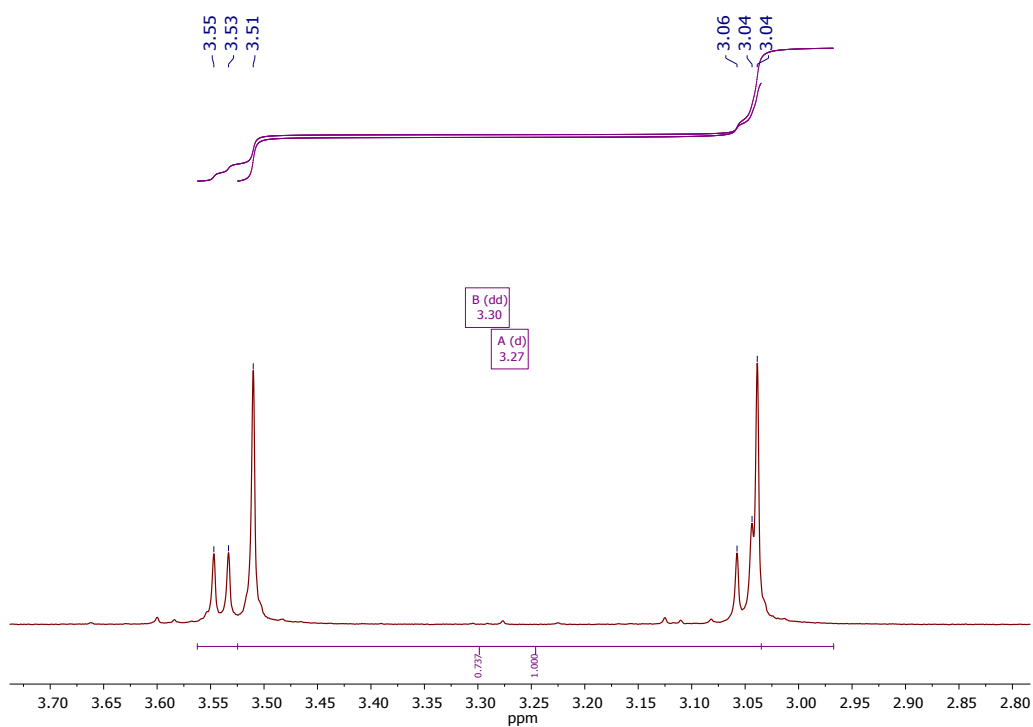

**Figure S15.**  $^1\text{H}$  NMR detail from the **3**-catalyzed reaction of  $^{13}\text{CO}_2$  with  $\text{HSiMe}_2\text{Ph}$  (**A**,  $^{13}\text{CH}_3\text{OSiMe}_2\text{Ph}$ ; **B**,  $^{13}\text{CH}_3\text{O}^{13}\text{CO}_2\text{SiMe}_2\text{Ph}$ )

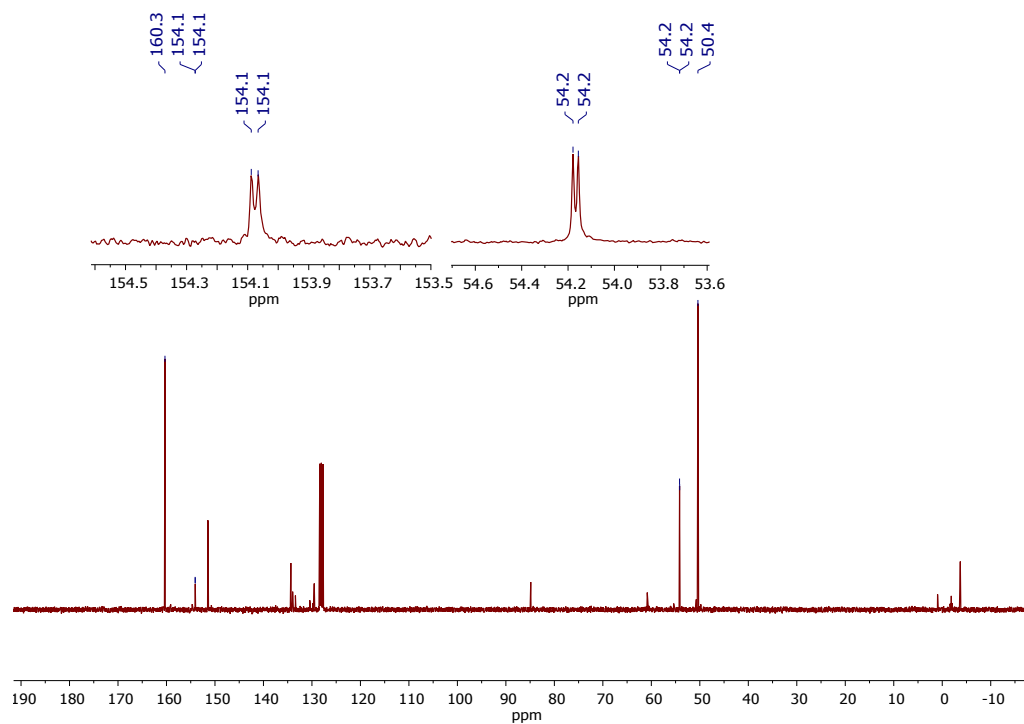

**Figure S16.**  $^{13}\text{C}\{^1\text{H}\}$  NMR from the **3**-catalyzed reaction of  $^{13}\text{CO}_2$  with  $\text{HSiMe}_2\text{Ph}$  (with details showing the  $^{13}\text{C}$ - $^{13}\text{C}$  coupling in the  $^{13}\text{CH}_3\text{O}^{13}\text{CO}_2\text{SiMe}_2\text{Ph}$  compound)

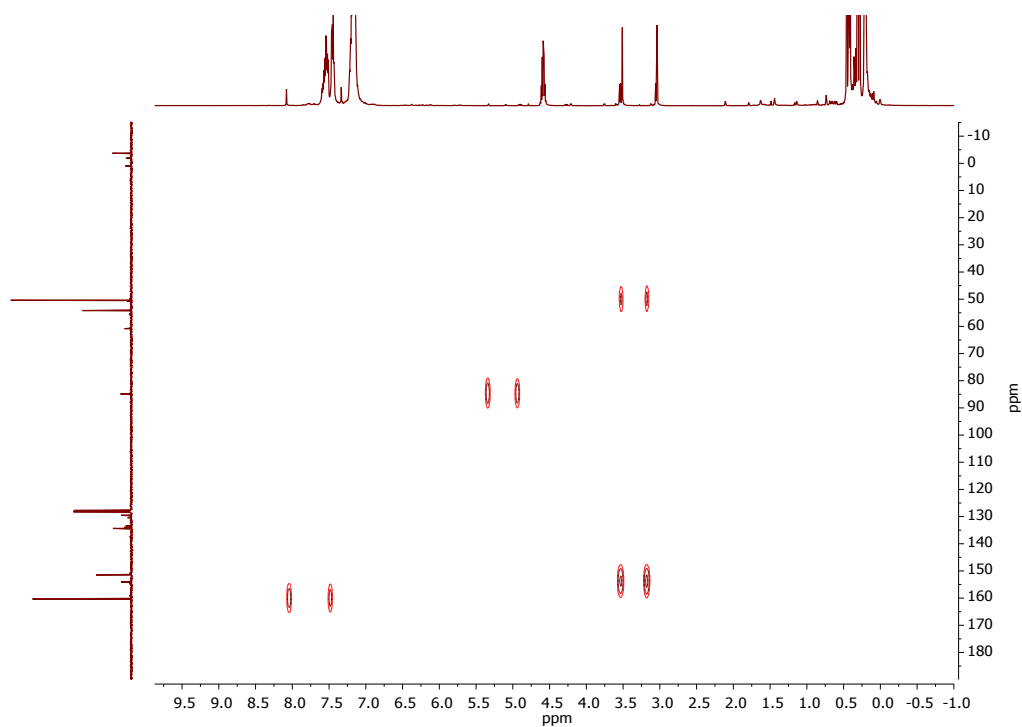

Figure S17.  $^1\text{H}$ - $^{13}\text{C}$  HMBC spectrum from the **3**-catalyzed reaction of  $^{13}\text{CO}_2$  with  $\text{HSiMe}_2\text{Ph}$

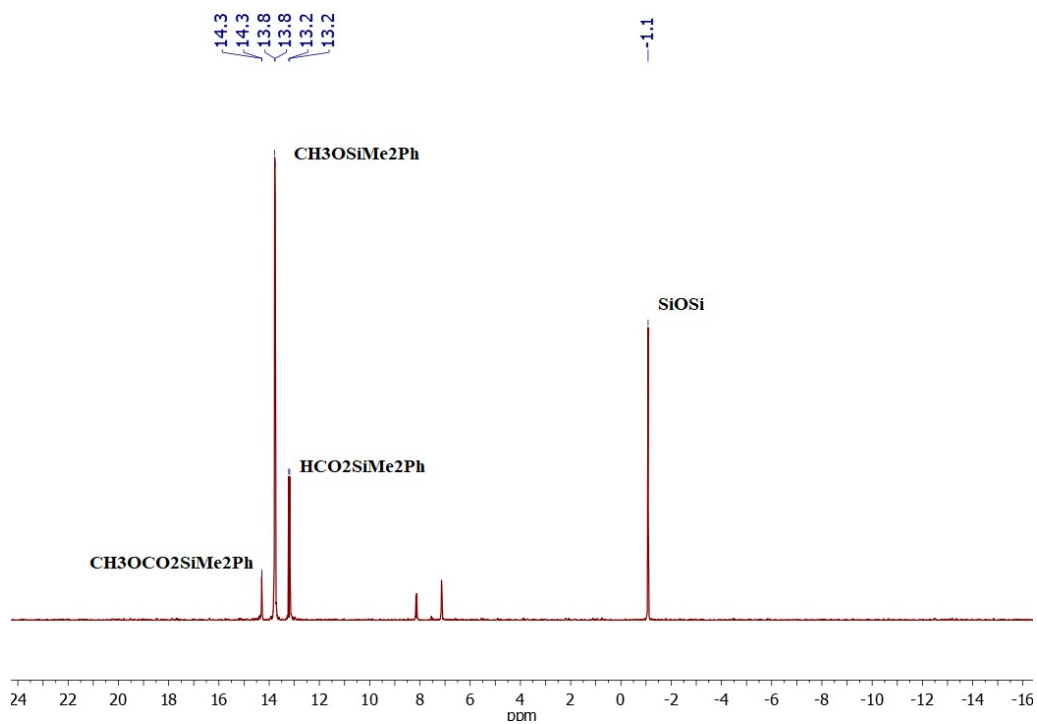

Figure S18.  $^{29}\text{Si}$  DEPT from the **3**-catalyzed reaction of  $^{13}\text{CO}_2$  with  $\text{HSiMe}_2\text{Ph}$

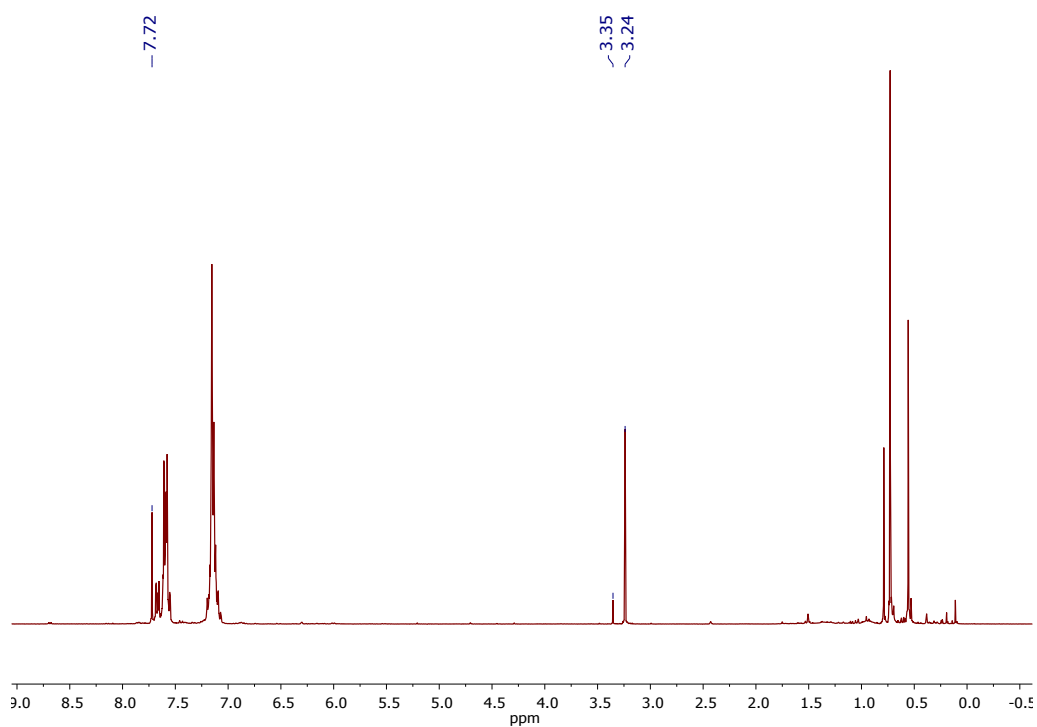

**Figure S19.**  $^1\text{H}$  NMR from the **3**-catalyzed reaction of  $^{12}\text{CO}_2$  with  $\text{HSiMePh}_2$

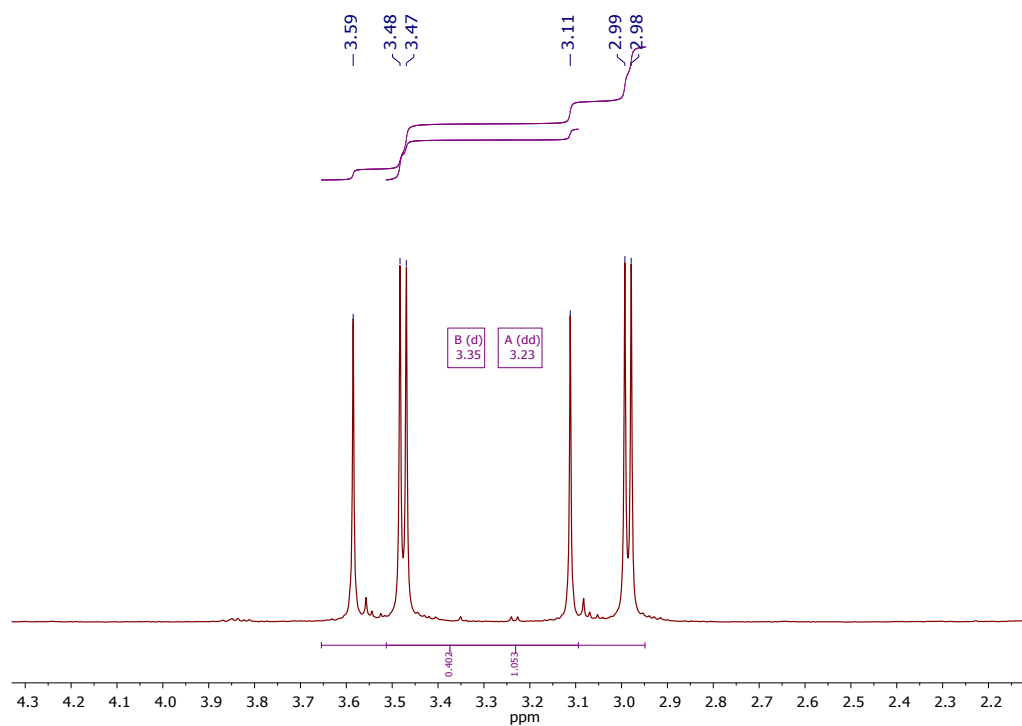

**Figure S20.**  $^1\text{H}$  NMR detail from the **3**-catalyzed reaction of  $^{13}\text{CO}_2$  with  $\text{HSiMePh}_2$  (**A**,  $^{13}\text{CH}_3\text{O}^{13}\text{CO}_2\text{SiMePh}_2$ ; **B**,  $^{13}\text{CH}_3\text{OSiMePh}_2$ )

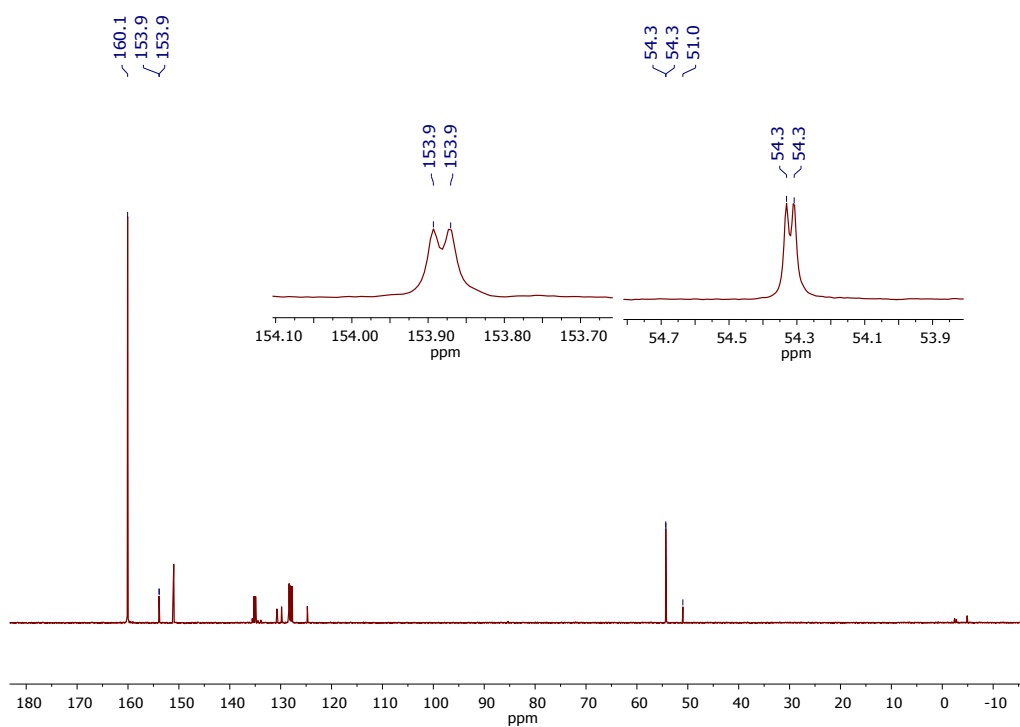

**Figure S21.**  $^{13}\text{C}\{^1\text{H}\}$  NMR from the **3**-catalyzed reaction of  $^{13}\text{CO}_2$  with  $\text{HSiMePh}_2$  (with details showing the  $^{13}\text{C}$ - $^{13}\text{C}$  coupling in the  $^{13}\text{CH}_3\text{O}^{13}\text{CO}_2\text{SiMePh}_2$  compound)

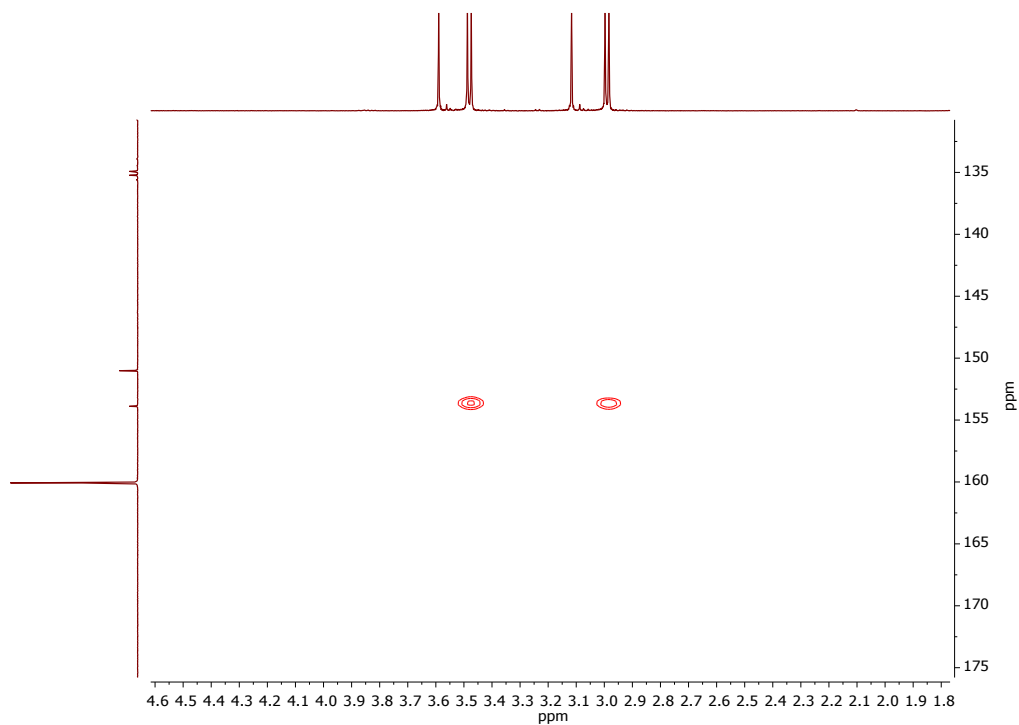

**Figure S22.**  $^1\text{H}$ - $^{13}\text{C}$  HMBC spectrum from the **3**-catalyzed reaction of  $^{13}\text{CO}_2$  with  $\text{HSiMePh}_2$

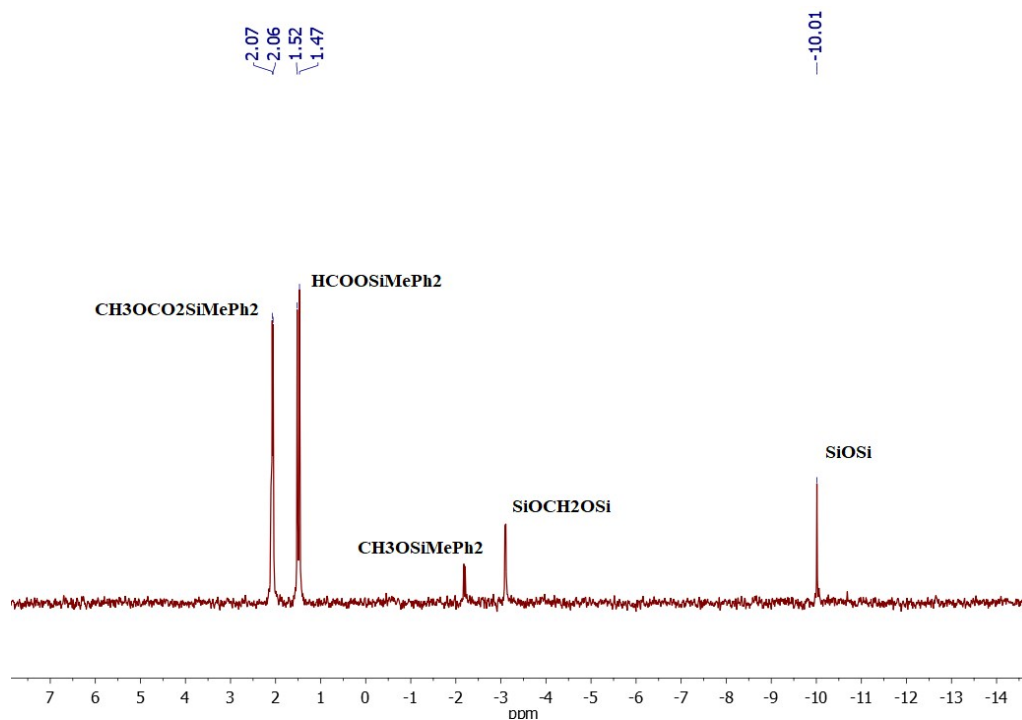

**Figure S23.**  $^{29}\text{Si}$  DEPT from the **3**-catalyzed reaction of  $^{13}\text{CO}_2$  with  $\text{HSiMePh}_2$

#### 4. Control Experiment

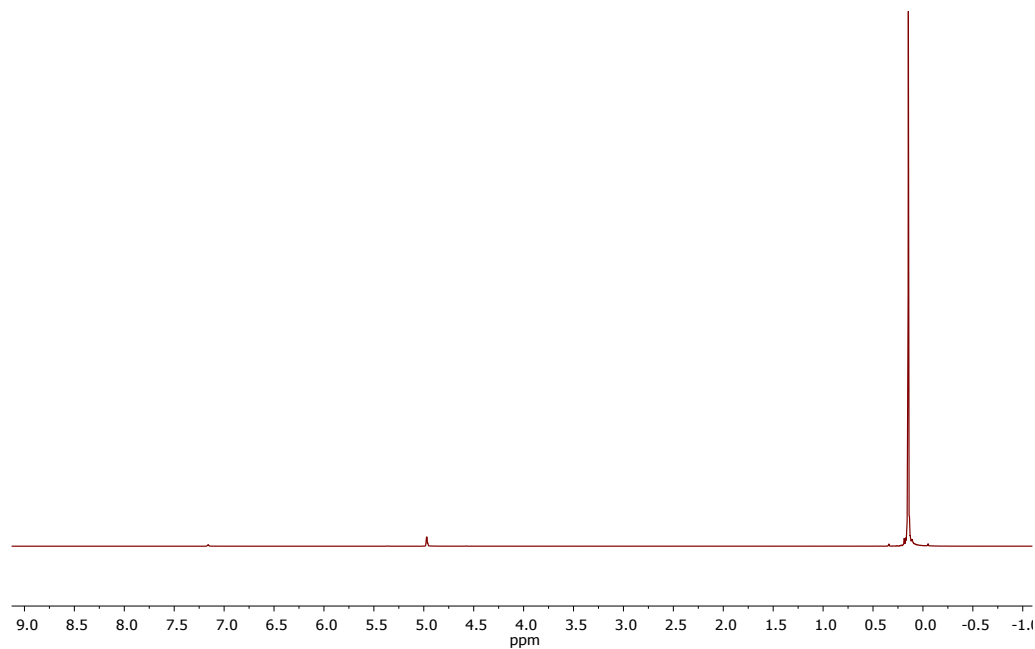

**Figure S24.**  $^1\text{H}$  NMR from the mixture of  $\text{CO}_2$  and  $\text{HSiMe(OSiMe}_3)_2$  in absence of **3** in  $\text{C}_6\text{D}_6$  after 24h at 323K

## 5. Crystal Structure Determination of Complex 3

Single crystal X-ray diffraction data were collected at 100(2) K with graphite-monochromated Mo K $\alpha$  radiation ( $\lambda=0.71072$  Å) using narrow frame rotation ( $\Delta\omega=0.3^\circ$ ) on a Bruker Smart APEX diffractometer. Measured intensities were integrated and corrected for absorption effects with SAINT+S<sup>1</sup> and SABABS<sup>2</sup> programs, included in APEX2 package. The structure was solved with direct methods with SHELXS-2013<sup>3</sup> and refined by full-matrix least-squares refinement on  $F^2$  with SHELXL-2018<sup>4</sup> program, included in WingX package.<sup>5</sup> The disordered solvent region has been analyzed with SQUEEZE program.<sup>6</sup>

CCDC 1972218 contains the supplementary crystallographic data for this paper. These data can be obtained free of charge from The Cambridge Crystallographic Data Centre via [www.ccdc.cam.ac.uk/structures](http://www.ccdc.cam.ac.uk/structures).

Crystal data compound **3**. C<sub>34</sub>H<sub>48</sub>F<sub>6</sub>Ir<sub>2</sub>N<sub>4</sub>O<sub>10</sub>S<sub>2</sub>Si<sub>4</sub>·0.5(H<sub>2</sub>O);  $M = 1364.65$ ; colourless prism 0.140 x 0.240 x 0.330 mm<sup>3</sup>; triclinic  $P\bar{1}$ ,  $a = 9.0468(5)$ ,  $b = 12.0453(6)$ ,  $c = 12.0619(7)$  Å,  $\alpha=66.4720(10)$ ,  $\beta=88.5460(10)$ ,  $\gamma = 88.7690(10)^\circ$ ,  $V = 1204.65(11)$  Å<sup>3</sup>;  $Z = 1$ ;  $D_c = 1.881$  g/cm<sup>3</sup>;  $\mu = 5.783$  mm<sup>-1</sup>;  $T_{\min}/T_{\max}$ : 0.1676/0.5996; 23425/5849 reflections measured/unique ( $R_{\text{int}} = 0.0179$ ), number of data/restraint /parameters 5849/0/286,  $R_1(F^2) = 0.0131$  (5771 reflections,  $I > 2\sigma(I)$ ) and  $wR(F^2) = 0.0324$  (all data), final  $GoF = 1.034$ , largest difference peak: 0.988 e.Å<sup>-3</sup>.

### Crystallographic references

- S1 SAINT+, version 6.01: Area-Detector Integration Software, Bruker AXS, Madison 2001.
- S2 SADABS 2016/02. L. Krause, R. Herbst-Irmer, G. M. Sheldrick, D. Stalke, *J. Appl. Crystallogr.* 2015, **48**, 3-10.
- S2 (a) G. M. Sheldrick, *Acta Crystallogr. A* 1990, **46**, 467-473; (b) G. M. Sheldrick, *Acta Crystallogr. A* 2008, **64**, 112-122.
- S3 G. M. Sheldrick, *Acta Crystallogr. C* 2015, **71**, 3-8.
- S4 L. J. Farrugia, *J. Appl. Crystallogr.* 2012, **45**, 849-854.
- S5 P. van der Sluis, A. L. Spek, *Acta Crystallogr.* 1990, **A46**, 194–201.
